# Supplementary material for: Gestational Diabetes Mellitus Impairs Nrf2-Mediated Adaptive Antioxidant Defenses and Redox Signaling in Fetal Endothelial Cells In Utero
Source: Oxford University Press journal article supplement (doi:10.2337/db13-0169), 2013-08-24

SUPPLEMENTARY DATA

**Supplementary Table 1.** Proteomic analysis of normal and GDM HUVEC.

|    | Protein identity                                    | SWISS PROT<br>Accession No. | Calculated MM<br>Da ( $\times 10^3$ ) | No. of unique<br>peptides | Coverage<br>(%) | Ratio | P      |
|----|-----------------------------------------------------|-----------------------------|---------------------------------------|---------------------------|-----------------|-------|--------|
|    | <b>Stress response</b>                              |                             |                                       |                           |                 |       |        |
| 2  | Heat shock cognate 71 kDa protein                   | HSP7C_HUMAN                 | 70.88                                 | 9                         | 14.70           | -1.62 | 0.0061 |
| 4  | Heat shock protein 75 kDa                           | TRAP1_HUMAN                 | 80.09                                 | 17                        | 26.60           | -1.37 | 0.0029 |
| 10 | Serpin H1                                           | SERPH_HUMAN                 | 46.42                                 | 5                         | 11.20           | 1.14  | 0.02   |
| 34 | Protein S100-A13                                    | S10AD_HUMAN                 | 11.45                                 | 3                         | 27.60           | 1.32  | 0.016  |
| 39 | Peptidyl-prolyl cis-trans isomerase FKBP1A          | FKBP1A_HUMAN                | 11.93                                 | 3                         | 28.70           | 1.68  | 0.046  |
|    | <b>Redox regulation</b>                             |                             |                                       |                           |                 |       |        |
| 8  | Protein disulfide-isomerase A3                      | PDIA3_HUMAN                 | 56.77                                 | 23                        | 51.10           | 1.12  | 0.026  |
| 30 | Glutathione S-transferase kappa 1                   | GSTK1_HUMAN                 | 25.48                                 | 9                         | 47.30           | -1.11 | 0.03   |
| 31 | Peroxiredoxin-1                                     | PRDX1_HUMAN                 | 22.09                                 | 5                         | 27.60           | -1.17 | 0.041  |
| 36 | Peroxiredoxin-5                                     | PRDX5_HUMAN                 | 22.01                                 | 5                         | 21.0            | 1.15  | 0.0084 |
|    | <b>Apoptosis</b>                                    |                             |                                       |                           |                 |       |        |
| 3  | Stress-70 protein                                   | GRP75_HUMAN                 | 73.66                                 | 7                         | 12.80           | -1.62 | 0.0061 |
| 33 | Galectin-1                                          | LEG1_HUMAN                  | 14.70                                 | 8                         | 67.40           | 1.29  | 0.018  |
| 29 | Voltage-dependent anion-selective channel protein 1 | VDAC1_HUMAN                 | 30.76                                 | 8                         | 30.70           | 1.72  | 0.041  |
|    | <b>Cell cycle</b>                                   |                             |                                       |                           |                 |       |        |
| 18 | Septin-2                                            | SEPT2_HUMAN                 | 41.47                                 | 9                         | 24.90           | 1.11  | 0.019  |
| 38 | Histone H4                                          | H4_HUMAN                    | 11.35                                 | 5                         | 31.10           | 1.68  | 0.046  |
| 27 | DNA replication GINS protein PSF3                   | PSF3_HUMAN                  | 24.52                                 | 4                         | 24.10           | -1.17 | 0.015  |

SUPPLEMENTARY DATA

|    | Protein identity                                          | SWISS PROT<br>Accession No. | Calculated MM<br>Da ( $\times 10^3$ ) | No. of unique<br>peptides | Coverage<br>(%) | Ratio | P       |
|----|-----------------------------------------------------------|-----------------------------|---------------------------------------|---------------------------|-----------------|-------|---------|
|    | <b>Glycolysis</b>                                         |                             |                                       |                           |                 |       |         |
| 9  | Pyruvate kinase isozymes M1/M2                            | KPYM_HUMAN                  | 57.92                                 | 14                        | 30.10           | 1.35  | 0.013   |
| 28 | Malate dehydrogenase                                      | MDHM_HUMAN                  | 35.49                                 | 3                         | 11.20           | -1.25 | 0.039   |
|    | <b>Mitochondrial ATP generation</b>                       |                             |                                       |                           |                 |       |         |
| 7  | ATP synthase subunit beta                                 | ATPB_HUMAN                  | 56.54                                 | 6                         | 14.40           | -1.17 | 0.02    |
| 11 | ATP synthase subunit alpha                                | ATPA_HUMAN                  | 59.73                                 | 6                         | 13.60           | 1.17  | 0.0064  |
|    | <b>Mitochondrial function</b>                             |                             |                                       |                           |                 |       |         |
| 26 | Aspartate aminotransferase                                | AATM_HUMAN                  | 47.46                                 | 12                        | 27.70           | 1.33  | 0.00012 |
| 25 | GrpE protein homolog 1, mitochondrial                     | GRPE1_HUMAN                 | 24.26                                 | 3                         | 14.30           | 1.16  | 0.019   |
|    | <b>Transcription and translation regulation</b>           |                             |                                       |                           |                 |       |         |
| 32 | Chromobox protein homolog 3                               | CBX3_HUMAN                  | 20.79                                 | 6                         | 30.10           | -1.17 | 0.047   |
| 24 | Peptidyl-prolyl cis-trans isomerase E                     | PPIE_HUMAN                  | 33.41                                 | 6                         | 15.60           | -1.12 | 0.05    |
| 23 | Heterogeneous nuclear ribonucleoprotein A1-like protein 2 | RA1L2_HUMAN                 | 34.21                                 | 5                         | 16.20           | -1.15 | 0.029   |
| 22 | Protein quaking                                           | QKI_HUMAN                   | 37.65                                 | 5                         | 15.80           | 1.18  | 0.005   |
| 13 | Elongation factor 1-delta                                 | EF1D_HUMAN                  | 31.10                                 | 7                         | 34.90           | -1.17 | 0.014   |
| 15 | Eukaryotic translation initiation factor 3 subunit I      | EIF3I_HUMAN                 | 36.48                                 | 8                         | 27.10           | -1.11 | 0.0017  |
|    | <b>Translation machinery</b>                              |                             |                                       |                           |                 |       |         |
| 12 | 40S ribosomal protein SA                                  | RSSA_HUMAN                  | 32.84                                 | 10                        | 36.30           | -1.14 | 0.016   |

# SUPPLEMENTARY DATA

|    |                                                |                                     |                                                        |                                   |                         |              |          |
|----|------------------------------------------------|-------------------------------------|--------------------------------------------------------|-----------------------------------|-------------------------|--------------|----------|
| 16 | 60S acidic ribosomal protein P0                | RLA0_HUMAN                          | 34.26                                                  | 7                                 | 31.20                   | -1.24        | 0.024    |
|    | <b>Protein identity</b>                        | <b>SWISS PROT<br/>Accession No.</b> | <b>Calculated MM<br/>Da (<math>\times 10^3</math>)</b> | <b>No. of unique<br/>peptides</b> | <b>Coverage<br/>(%)</b> | <b>Ratio</b> | <b>P</b> |
| 35 | 40S ribosomal protein S12                      | RS12_HUMAN                          | 14.50                                                  | 4                                 | 27.30                   | -1.1         | 0.036    |
| 37 | 60S ribosomal protein L23                      | RL23_HUMAN                          | 14.85                                                  | 3                                 | 22.10                   | -1.27        | 0.033    |
|    | <b>Protein degradation</b>                     |                                     |                                                        |                                   |                         |              |          |
| 19 | 3-hydroxyisobutyryl-CoA hydrolase              | HIBCH_HUMAN                         | 43.47                                                  | 2                                 | 5.96                    | -1.27        | 0.032    |
| 20 | 26S proteasome non-ATPase regulatory subunit 7 | PSD7_HUMAN                          | 37.01                                                  | 4                                 | 15.10                   | -1.27        | 0.032    |
|    | <b>Cytoskeletal proteins</b>                   |                                     |                                                        |                                   |                         |              |          |
| 5  | Lamin-A/C                                      | LMNA_HUMAN                          | 74.12                                                  | 11                                | 19.90                   | -1.21        | 0.04     |
| 14 | Vimentin                                       | VIME_HUMAN                          | 53.63                                                  | 7                                 | 17.20                   | -1.15        | 0.019    |
| 6  | Lamina-associated polypeptide 2, alpha         | LAP2A_HUMAN                         | 75.48                                                  | 6                                 | 11.00                   | -1.21        | 0.04     |
|    | <b>Others</b>                                  |                                     |                                                        |                                   |                         |              |          |
| 17 | Uroporphyrinogen decarboxylase                 | DCUP_HUMAN                          | 40.77                                                  | 5                                 | 13.10                   | -1.15        | 0.011    |
| 21 | Methionine adenosyltransferase 2 subunit beta  | MAT2B_HUMAN                         | 37.53                                                  | 3                                 | 10.80                   | -1.27        | 0.032    |
| 1  | Annexin A6                                     | ANXA6_HUMAN                         | 75.86                                                  | 13                                | 20.70                   | -1.37        | 0.0041   |

\*A negative or positive ratio indicates a decrease or an increase in GDM HUVEC compared with normal HUVEC, respectively. P values are calculated using unpaired Student's *t*-test.

# SUPPLEMENTARY DATA

**Supplementary Table 2.** Clinical characteristics of normal and gestational diabetic patients for proteomic analysis

|                                                  | Normal<br>(n=5)                                    | Gestational diabetes<br>(n=5)                      |
|--------------------------------------------------|----------------------------------------------------|----------------------------------------------------|
| Maternal age (years)                             | 32 ± 7                                             | 34 ± 6                                             |
| Body mass index                                  | 25 ± 4                                             | 33 ± 4*                                            |
| Fasting glucose (mmol/L)                         | -                                                  | 8.4 ± 0.7 <sup>###</sup>                           |
| Oral glucose tolerance test<br>(75g, 2h, mmol/L) | -                                                  | 9.0 ± 0.6                                          |
| HbA <sub>1c</sub> (mmol/mol)                     | -                                                  | 42 ± 7                                             |
| Systolic blood pressure (mmHg)                   | 111 ± 12                                           | 120 ± 9                                            |
| Diastolic blood pressure (mmHg)                  | 64 ± 9                                             | 70 ± 7                                             |
| Ethnicity                                        | 2 Caucasian<br>1 Black<br>0 Asian<br>2 Other/mixed | 2 Caucasian<br>2 Black<br>1 Asian<br>0 Other/mixed |
| Gestational age (weeks)                          | 39.8 ± 0.4                                         | 38.6 ± 0.3                                         |
| Caesarean delivery                               | 0/5                                                | 4/5                                                |
| Newborn gender (Male:Female)                     | 3:2                                                | 1:4                                                |
| Birth weight (kg)                                | 3.6 ± 0.4                                          | 3.8 ± 1.1                                          |

Values denote mean ± S.D, \*  $P < 0.05$  versus normal subjects, <sup>###</sup>  $P < 0.001$  versus theoretical mean of 5.1 mmol/L.

**Supplementary Table 3.** Primer sequences of qRT-PCR

| Gene names               |            | Sequence (5'-3')           |
|--------------------------|------------|----------------------------|
| <b>Genes of interest</b> |            |                            |
| <b>NQO1</b>              | Sense      | GCCCAGATATTGTGGCTGA        |
|                          | Anti-sense | ACCACTGCAGGGGGAAC          |
| <b>xCT</b>               | Sense      | GGGAAAGTCTTGGAAGTCAGG      |
|                          | Anti-sense | CCAAGTTAGGGATTAGCTGGTC     |
| <b>GCLM</b>              | Sense      | GAAGAAGATATTTTCCTGTCATTGAT |
|                          | Anti-sense | CCATTCATGTATTGAAGAGTGAATTT |
| <b>Keap1</b>             | Sense      | ACCACAACAGTGTGGAGAGGT      |
|                          | Anti-sense | CGATCCTTCGTGTCAGCAT        |
| <b>Bach1</b>             | Sense      | GCAGCAGTTCCACTCAAG         |
|                          | Anti-sense | GGTTCAAATCCTTTAACTGTCACC   |
| <b>Nox4</b>              | Sense      | TCCTCGGTGGAAACTTTTGT       |
|                          | Anti-sense | CCACAACAGAAAACACCAACTG     |
| <b>Reference genes</b>   |            |                            |
| <b>ACTB</b>              | Sense      | CCAACCGCGAGAAGATGA         |
|                          | Anti-sense | CCAGAGGCGTACAGGGATAG       |
| <b>SDHA</b>              | Sense      | AGAAGCCCTTTGAGGAGCA        |
|                          | Anti-sense | CGATTACGGGTCTATATTCCAGA    |
| <b>RPL13A</b>            | Sense      | GAGGCCCTACCACTTCC          |
|                          | Anti-sense | AACACCTTGAGACGGTCCAG       |

**Supplementary Table 4.** Primer sequences for COBRA

| Gene                          |            | Sequence (5'-3')               |
|-------------------------------|------------|--------------------------------|
| <b>Nrf2</b>                   |            |                                |
| <b><i>Positive strand</i></b> |            |                                |
| CGI-176-BIS-2                 | Sense      | TTATAAAGTAGGAAAGGGTTAAT        |
|                               | Anti-sense | CCTTAAACTCTCTTAAAAACCCAAC      |
| CGI-176-BIS-3                 | Sense      | AGTTTAAGGTTGTTAGAGAGTGATT      |
|                               | Anti-sense | AAAAAATCTAAAACTAAACCC          |
| CGI-176-BIS-4                 | Sense      | GGTAGTTTTAAGTTTATTATGATGAGTTGT |
|                               | Anti-sense | CTACTAAAACCCCAACTAACAATCC      |
| <b><i>Negative strand</i></b> |            |                                |
| CGI-176-BIS-1                 | Sense      | TATGTTGTGGTATTATATATTGTTGAAGG  |
|                               | Anti-sense | ATCTCCATTCTCCTAAACTCAAATC      |
| CGI-176-BIS-2                 | Sense      | ATTTGAGTTTAGGAGAATGGAGATA      |
|                               | Anti-sense | AAAACCAATAAACCCCTACCTAAAAAAA   |
| CGI-176-BIS-3                 | Sense      | GATTTGAGTTTAGGAGAATGGAGATA     |
|                               | Anti-sense | AAACCAATAAACCCCTACCTAAAAAAA    |
| CGI-176-BIS-4                 | Sense      | TGTTTTAATTGTTTAAATTGTTTTAAAG   |
|                               | Anti-sense | ACTACCAACTAAAATCCCAACAAAC      |
| CGI-176-BIS-5                 | Sense      | TGAGATAAAAGTAGGGTAAGGTTTTGTA   |
|                               | Anti-sense | AAACTACCAACTAAAATCCCAACAA      |
| CGI-176-BIS-6                 | Sense      | GGTTTTGGGGGAGAATTTAGT          |
|                               | Anti-sense | CTTTCAAAAAACTCAAAACTACCAA      |

**Supplementary Table 5.** Primer sequences for HRM

| Gene          |            | Sequence (5'-3')              |
|---------------|------------|-------------------------------|
| <b>Nrf2</b>   |            |                               |
| CGI-176-HRM-1 | Sense      | CGTTTTATATATTTTGGGAATTGTAATTT |
|               | Anti-sense | CGATTAACCCCTTTCCTACTTTTATAA   |
| CGI-176-HRM-2 | Sense      | CGAGGGTTGTTGTGACGGTTAAT       |
|               | Anti-sense | CGAAAACAATAAACTCTAAAA         |
| CGI-176-HRM-3 | Sense      | GGCGTTACGAGGGGTTAATTT         |
|               | Anti-sense | CGCCTTAAATACCCAACGAACTCAAA    |
| CGI-176-HRM-4 | Sense      | TTTCGTTTCGGGGTTGGGTTTTTA      |
|               | Anti-sense | CGCCCCAAAACCTCCTTAA           |
| CGI-79-HRM-1  | Sense      | CGTTGGATTTATTAGGTTTAGTAGTATT  |
|               | Anti-sense | CGCGCACCTACCAAACAAATAAA       |
| CGI-79-HRM-2  | Sense      | CGAGGATATTATTTAGGGTTTT        |
|               | Anti-sense | CGACGAATACCATACGTCTAAAA       |
| CGI-79-HRM-3  | Sense      | CGTTTTGAGTGATTTTTTATT         |
|               | Anti-sense | CGAAACCGACCCAACAAATAACCAAA    |
| CGI-79-HRM-4  | Sense      | CGGTTGTAGCGGGTGGGATTGGTTT     |
|               | Anti-sense | CGCTACTCACCGCTTCTTTAA         |
| CGI-79-HRM-5  | Sense      | CGGGTTTGTGTTGTAGGAGGGTAT      |
|               | Anti-sense | CGCCCCCTTCCTAACAAAATCCAAA     |
| CGI-79-HRM-6  | Sense      | CGGGATGGGATGGTGGATTTTGGTT     |
|               | Anti-sense | CGATTTCTCCCTCAAAATCAA         |
| <b>NQO1</b>   |            |                               |
| CGI-19-HRM-1  | Sense      | CGGTTTTGGTTTTCGTTAAATT        |
|               | Anti-sense | CGAACTTCTAAAAAAAATAAAAA       |
| CGI-19-HRM-2  | Sense      | CGTAAGTTTGATTTGGTTTTT         |
|               | Anti-sense | CGAACTCCGAAAAAAAAAAAACTTC     |
| CGI-19-HRM-3  | Sense      | CGATTAAGGTTTATTTTAGGTTT       |
|               | Anti-sense | CGATAAATACTACAAAAAA           |
| CGI-19-HRM-4  | Sense      | CGGGGCGTTGATTGGTTGGGTT        |
|               | Anti-sense | CGCCCTTATAAACTATCCACCTCAAA    |
| CGI-19-HRM-5  | Sense      | CGGGATTTAACGTTTGAATTTT        |
|               | Anti-sense | CGAAAACTTTTCTTAAC             |
| CGI-19-HRM-7  | Sense      | CGAAATGGAGTAGAAAAAGAGT        |
|               | Anti-sense | CGTCTCCACGAAACATA             |

SUPPLEMENTARY DATA

**Supplementary Figure 1.** Canonical pathway analysis by Ingenuity Pathway Analysis (IPA) of normal and GDM HUVEC under basal conditions. An IPA analysis computed signaling pathways likely to be affected in the GDM proteome. Submission of the 39 altered proteins (see Supplemental Table I) to IPA canonical pathway analysis identified the pathways from the IPA library of canonical pathways that were most significant to the data set. Molecules from the data set that met the Normal/GDM ratio cutoff of  $>1.1$  or  $<-1.1$  and P cutoff of  $<0.05$  and associated with a canonical pathway in the Ingenuity Knowledge Base were considered for analysis. The significance of the association between the data set and the canonical pathway was measured in TWO ways: (i) Ratio (orange square) of the number of molecules from the data set that map to the pathway divided by the total number of molecules that map to the canonical pathway is displayed (right-hand Y-axis) and (ii) Fisher's exact test is used to calculate a P value determining the probability that the association between the genes in the data set and the canonical pathway (left-hand Y-axis), with the threshold line displayed to show the level of statistical significance.

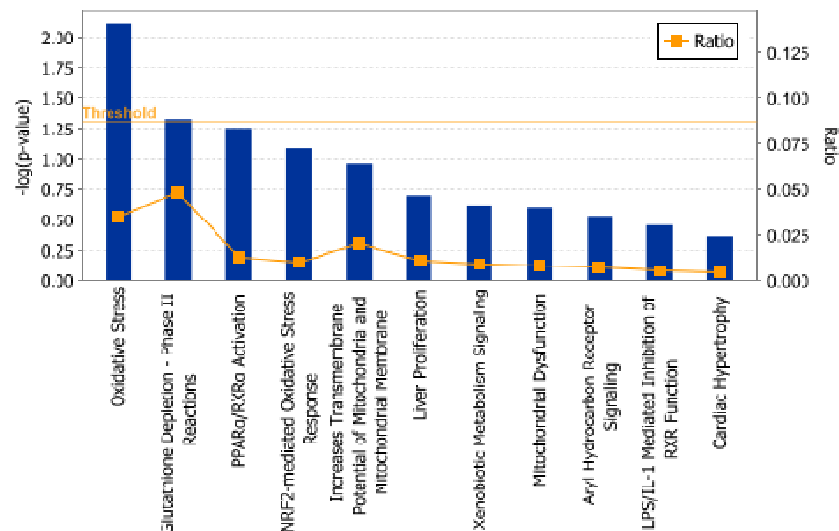

## SUPPLEMENTARY DATA

**Supplementary Figure 2.** Comparison of basal protein carbonylation, GCLM protein expression and glucose-6-phosphate dehydrogenase protein expression and enzyme activity in normal and GDM HUVEC. *A*, Basal protein carbonylation was assessed in DNPH-derivatized extracts and expressed relative to  $\alpha$ -tubulin in cells from normal ( $n=3$ ) and GDM ( $n=3$ ) donors. Representative immunoblot of normal versus GDM lysates run on a single membrane with non-relevant lanes omitted. *B*, Normal and GDM HUVEC were treated with vehicle or HNE (20 $\mu$ mol/L) for 12 h before determining GCLM protein expression relative to  $\alpha$ -tubulin in cells from normal ( $n=4$ ) and GDM ( $n=4$ ) donors. Representative immunoblot of normal and GDM samples run on the same membrane with non-relevant lanes omitted. *C-D*, G6PD protein expression in cell lysates from 5 normal and 5 GDM donors, with densitometric analysis of basal expression relative to  $\alpha$ -tubulin. *E*, G6PD enzyme activity in HUVEC from normal and GDM pregnancies was measured using a previously reported protocol (Afzal-Ahmed, Free Radic. Biol. Med. 2007; 42:1781-1790). Relative G6PD activity was assessed measuring the rate of NADPH generation and expressed per mg protein. Data denote mean  $\pm$  S.E.M. of measurements in independent cultures derived from 5 normal and 5 GDM donors.

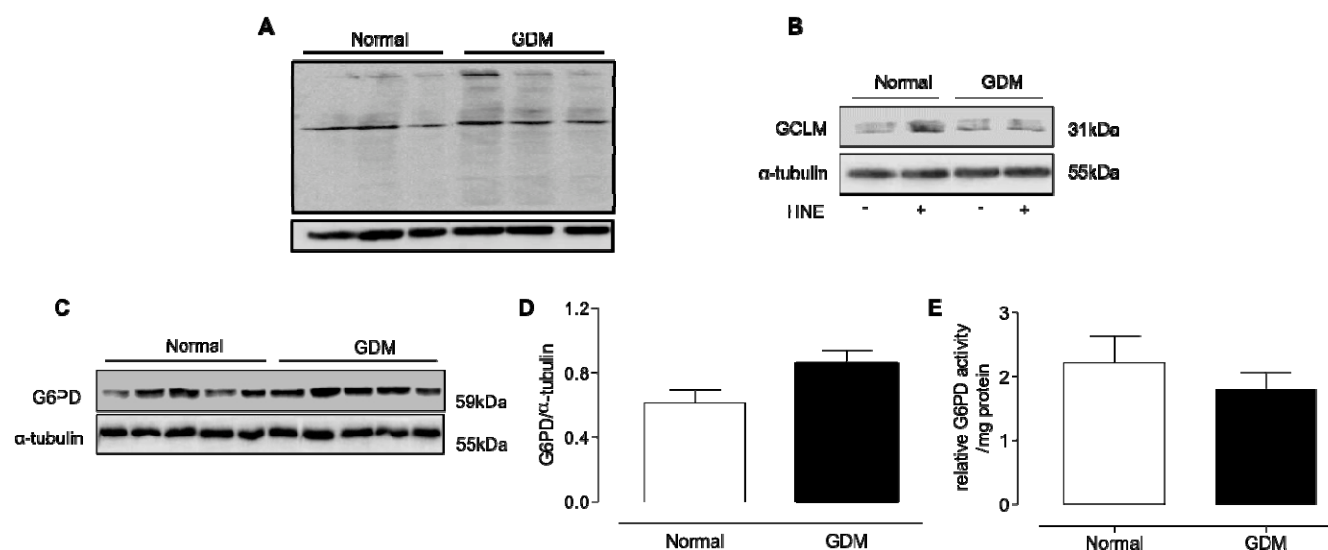



**Supplementary Figure 3.** Analysis of Nrf2 CpG island methylation in normal and GDM HUVEC by COBRA and HRM. DNA from normal and GDM untreated HUVEC (passage 1 and 3) was extracted (Qiagen #69504) before bisulphite modification. Nrf2 CpG Island 176 methylation was assessed by combined bisulphite restriction analysis (COBRA). PCR products containing 1 or more CpGTaq<sup>α</sup>1 restriction sites were obtained using bisulphite-specific primers and incubated in the presence of Taq<sup>α</sup>1 to cleave methylated DNA in which the Taq<sup>α</sup>1 restriction site remains conserved. **A:** Representative composite gel image of PCR products obtained using CGI-176-BIS-5 primers in normal and GDM HUVEC showing no widespread sample methylation. In each gel, samples were run alongside 50% methylated standards (M50) which show digested products of a lower molecular weight (~150bp) in the Taq<sup>α</sup>1 digested but not undigested control sample. Nrf2 and NQO1 methylation was further critically assessed by high resolution melt (HRM) analysis. **B:** Representative high resolution melt analysis obtained using Nrf2\_79\_HRM\_1 primers. 0% methylated DNA (M0) melts at the lower temperature of 79°C compared with the 100% methylated DNA (M100, 81.50°C). The 50% methylated DNA (M50) standard melts at both temperatures giving a bimodal peak. Standards were run alongside sample DNA to assess whether GDM was associated with DNA methylation of the Nrf2 and NQO1 (not shown) promoter regions. All primers used are detailed in Supplemental Tables IV and V for COBRA and HRM analysis, respectively.

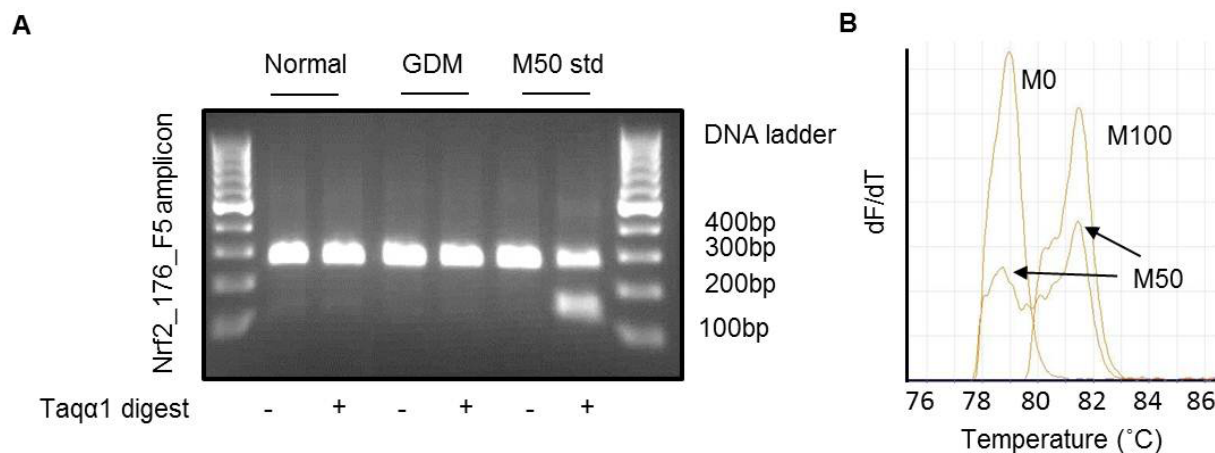

Supplement: db130169supplementarydata.pdf [file db130169supplementarydata.pdf]
